# Supplementary material
Source: PubMed Central journal article supplement (PMC7249467)
Supplement: Supp_Fig1.pdf [file Supp_Fig1.pdf]

## Supplementary Data

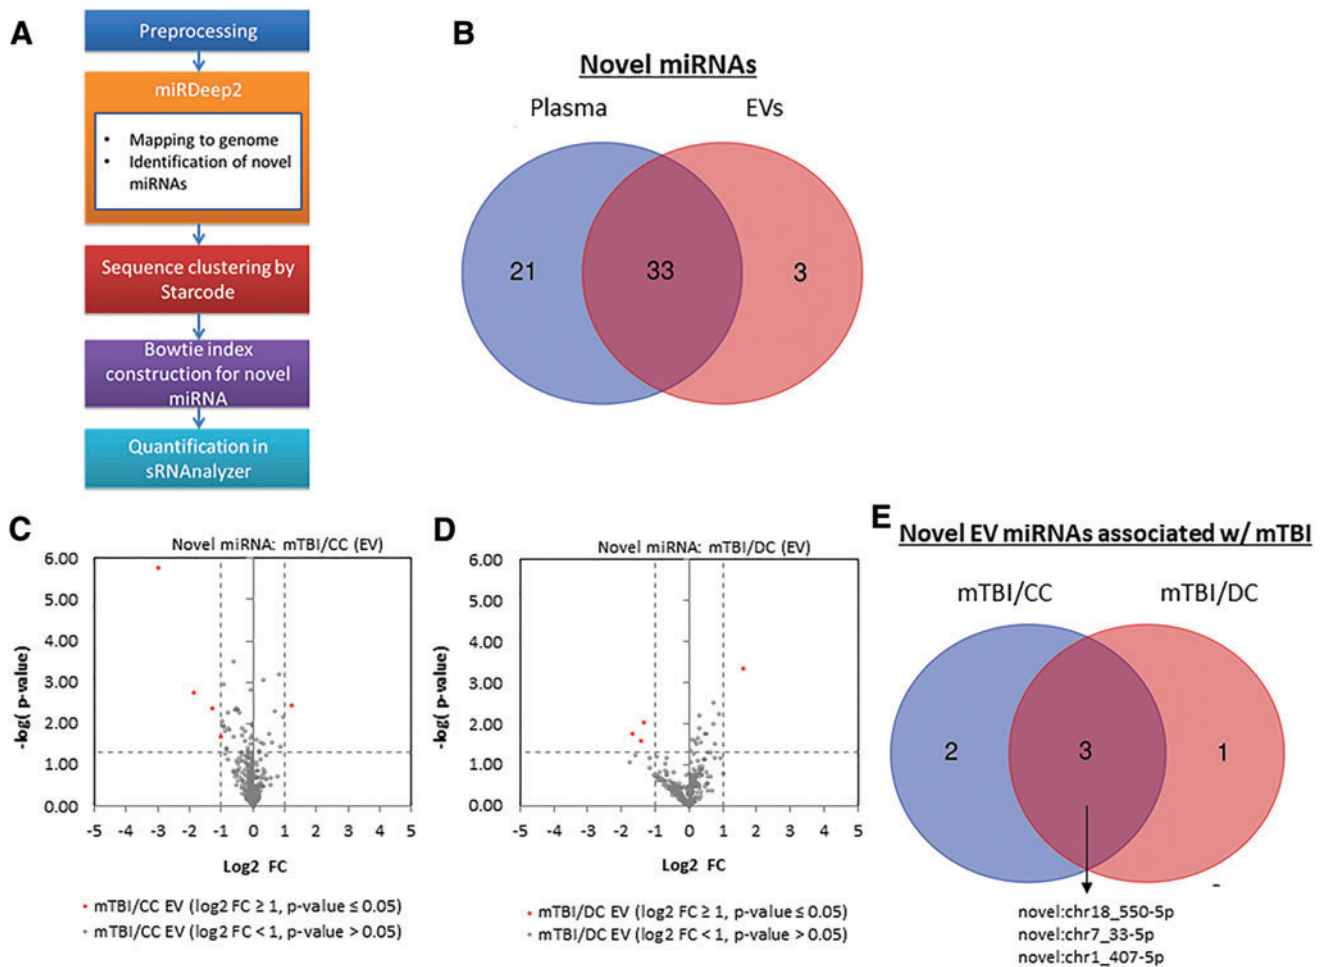

**SUPPLEMENTARY FIG. S1.** Novel microRNAs (miRNAs) associated with traumatic brain injury (TBI) in plasma and extracellular vesicles (EVs). **(A)** Overview of novel miRNA mapping procedure. **(B)** Venn diagram of number of novel miRNAs identified from whole plasma and plasma EVs. **(C, D)** Volcano plots showing novel plasma EV miRNA log<sub>2</sub> fold change (log<sub>2</sub>FC) versus *p* value between **(C)** chronic mild TBI (mTBI) subjects and community controls (CC), and **(D)** chronic mTBI subjects and deployed controls (DC). **(E)** Overlap between novel plasma EV miRNAs that show concentration differences in **C** and **D**. For volcano plots, gray unfilled circles represent miRNAs with a *p* value >0.05, and red circles represent miRNAs with a *p* < 0.05, and a log<sub>2</sub>FC > ±1 (fold change >2). CC, community controls; DC, deployed controls; MTBI, mild traumatic brain injury group.
