# Supplementary material
Source: PubMed Central journal article supplement (PMC7249467)
Supplement: Supp_Fig2.pdf [file Supp_Fig2.pdf]

|    | Tube # |                           |
|----|--------|---------------------------|
| DC | 1      | POOL 1<br>(17.2ul/sample) |
| DC | 2      |                           |
| DC | 3      |                           |
| DC | 4      |                           |
| DC | 5      |                           |
| DC | 6      |                           |
| DC | 7      |                           |
| DC | 8      | POOL 2<br>(20ul/sample)   |
| DC | 9      |                           |
| DC | 10     |                           |
| DC | 11     |                           |
| DC | 12     |                           |
| DC | 13     |                           |
| CC | 60     | POOL 3<br>(12ul/sample)   |
| CC | 49     |                           |
| CC | 71     |                           |
| CC | 61     |                           |
| CC | 64     |                           |
| CC | 65     |                           |
| CC | 72     |                           |
| CC | 73     |                           |
| CC | 16     | POOL 4<br>(12ul/sample)   |
| CC | 19     |                           |
| CC | 14     |                           |
| CC | 15     |                           |
| CC | 67     |                           |
| CC | 48     |                           |
| CC | 50     |                           |
| CC | 51     |                           |
| CC | 52     |                           |
| CC | 53     |                           |
| CC | 55     |                           |
| CC | 57     |                           |

|      | Tube # |                          |
|------|--------|--------------------------|
| mTBI | 21     | POOL 5<br>(9.3ul/sample) |
| mTBI | 22     |                          |
| mTBI | 23     |                          |
| mTBI | 24     |                          |
| mTBI | 25     |                          |
| mTBI | 26     |                          |
| mTBI | 27     |                          |
| mTBI | 28     |                          |
| mTBI | 29     |                          |
| mTBI | 30     |                          |
| mTBI | 31     |                          |
| mTBI | 33     | POOL 6<br>(8.6ul/sample) |
| mTBI | 36     |                          |
| mTBI | 32     |                          |
| mTBI | 34     |                          |
| mTBI | 35     |                          |
| mTBI | 47     |                          |
| mTBI | 37     |                          |
| mTBI | 38     |                          |
| mTBI | 39     |                          |
| mTBI | 40     |                          |
| mTBI | 41     |                          |
| mTBI | 42     |                          |
| mTBI | 43     |                          |
| mTBI | 44     |                          |
| mTBI | 45     |                          |
| mTBI | 46     |                          |

**SUPPLEMENTARY FIG. S2.** Pooling scheme for isobaric tag for relative and absolute quantitation (iTRAQ) experiment. Scheme depicting how samples were pooled into subpools for iTRAQ experiment. Pools 1 and 2 were deployed control (DC) samples, pools 3 and 4 were community control (CC) samples, and pools 5 and 6 were mild traumatic brain injury (mTBI) samples.
