# Supplementary material
Source: PubMed Central journal article supplement (PMC7249467)
Supplement: Supp_Table1.pdf [file Supp_Table1.pdf]

SUPPLEMENTARY TABLE S1. SUBJECT CHARACTERISTICS OF DISCOVERY COHORT

| <i>Blast-related mTBI Deployed controls (DC) Civilian controls (CC)</i> |                        |                        |                        |                |
|-------------------------------------------------------------------------|------------------------|------------------------|------------------------|----------------|
| <i>Demographics</i>                                                     | <i>Mean (SD) range</i> | <i>Mean (SD) range</i> | <i>Mean (SD) range</i> | <i>p value</i> |
| Age (years)                                                             | 32.7 (10.8) 22–60      | 29.7(5.2), 23–42       | 33.3 (10.7) 22–61      | n.s.           |
| Race % (A, B/AA, W, O)                                                  | 3.7, 7.4, 74.1, 14.8   | 0, 18.2, 54.5, 27.3    | 9.7, 0, 80.6, 9.7      | n.s.           |
| Hispanic %                                                              | 7.4                    | 9.1                    | 6.5                    | n.s.           |
| APOE4 positive %                                                        | 33.3                   | 63.6                   | 25.8                   | n.s.           |
| <i>Blast exposure/TBI history</i>                                       |                        |                        |                        |                |
| Number of blast-related mTBIs during service                            | 14 (22) 1–100          | 0                      | N.D.                   |                |
| Number of lifetime mTBIs with LOC                                       | 2.0 (1.7) 0–6          | 0                      | N.D.                   |                |
| Time since last blast-related mTBI to blood draw (years)                | 4.6 (1.5) 1.6–7.7      |                        |                        |                |
| <i>Behavioral measures</i>                                              |                        |                        |                        |                |
| PCL-M Total score                                                       | 51.1 (18.2) 22–83      | 26 (10) 17–45          | N.D.                   | 0.001          |
| PHQ-9 score                                                             | 11.2 (7.9) 0–25        | 3.82 (4.8) 0–12        | N.D.                   | 0.007          |
| PSQI score                                                              | 10.6 (4.9) 1–19        | 5.6 (3.4) 1–11         | N.D.                   | 0.004          |
| AUDIT-C score                                                           | 4.2 (2.4) 0–10         | 2.8 (1.7) 0–5          | N.D.                   | n.s.           |

Groups were statistically comparable in terms of: Age ( $F[2,66]=0.503$ , n.s.,  $n=27, 11, 31$ , mTBI, DC, CC, respectively); race indicated as Asian (A), black/African American (B/AA), white (W), and other (O) ( $\chi^2 [6]=8.96$ , n.s.,  $n=27, 11, 31$ , mTBI, DC, CC); percent self-identifying as Hispanic ( $\chi^2 [2]=0.09$ , n.s.,  $n=27, 11, 31$ , mTBI, DC, CC); and percent APOE4 positive ( $\chi^2 [2]=5.163$ , n.s.,  $n=27, 11, 31$ , mTBI, DC, CC). All participants were male. Loss of consciousness (LOC) denotes number of reported LOCs lasting <30 min (LOC >30 was a study exclusion criterion). Post-traumatic stress disorder (PTSD) was evaluated with the PTSD Checklist-Military version (PCL-M) ( $T[36]=4.29$ ,  $p\leq 0.001$ ,  $n=27$  and  $11$ , mTBI and DC). Presence and severity of depressive symptoms were evaluated with the Patient Health Questionnaire-9 (PHQ-9) ( $T[36]=2.85$ ,  $p\leq 0.007$ ,  $n=27$  and  $11$ , mTBI and DC). The Pittsburgh Sleep Quality Index (PSQI) evaluated sleep quality ( $T[34]=3.10$ ,  $p\leq 0.004$ ,  $n=25$  and  $11$ , mTBI and DC). Alcohol use was measured with the Alcohol Use Disorders Identification Test-Consumption items (AUDIT-C) ( $T[36]=1.69$ , n.s.,  $n=27$  and  $11$ , mTBI and DC). N.D. indicates not determined and n.s. denotes non statistically significant.

mTBI, mild traumatic brain injury; SD, standard deviation. APOE, apolipoprotein E.
