# Supplementary material
Source: PubMed Central journal article supplement (PMC7249467)
Supplement: Supp_Table2.pdf [file Supp_Table2.pdf]

SUPPLEMENTARY TABLE S2. SUBJECT CHARACTERISTICS OF VERIFICATION COHORT

| <i>Blast-related mTBI Civilian controls (CC)</i>         |                        |                        |                |
|----------------------------------------------------------|------------------------|------------------------|----------------|
| <i>Demographics</i>                                      | <i>Mean (SD) range</i> | <i>Mean (SD) range</i> | <i>p value</i> |
| Age (years)                                              | 38.85 ± 8.4            | 34.7 ± 10.2            | n.s.           |
| Race % (A, B/AA, W, O)                                   | A:5%, W:80%, O:15%     | A:10%, W:80%, O:10%    | n.s.           |
| Hispanic %                                               | 15%                    | 10%                    | n.s.           |
| APOE4 positive %                                         | X,4:10%; 4,4: 5%       | X,4:25%; 4,4: 0%       | n.s.           |
| <b>Blast exposure/TBI history</b>                        |                        |                        |                |
| Number of blast-related mTBIs during military service    | 50.4 (119.5) 2 ≥ 500   | N.D.                   |                |
| Number of lifetime mTBIs with LOC                        | 1.2 (2.3)              | N.D.                   |                |
| Time since last blast-related mTBI to blood draw (years) | 6.3 (3.5)              |                        |                |

Groups were statistically comparable in terms of: age; race indicated as Asian (A), black/African American (BI/AA), white (W), and other (O); percent self-identifying as Hispanic, and percent APOE4 positive. All participants were male. Loss of consciousness (LOC) denotes number of reported LOCs lasting <30 min (LOC >30 was a study exclusion criterion). N.D. indicated not determined.

mTBI, mild traumatic brain injury; SD, standard deviation. APOE, apolipoprotein E.
