# Supplementary material
Source: PubMed Central journal article supplement (PMC7249467)
Supplement: Supp_Table3.pdf [file Supp_Table3.pdf]

SUPPLEMENTARY TABLE S3. LIST OF SAMPLE AND TEST CONDUCTED

| <i>Sample</i> | <i>Phenotype</i> | <i>Plasma miRNA (sRNAseq)</i> | <i>EV miRNA (sRNAseq)</i> | <i>iTRAQ pool</i> | <i>CRP ELISA</i> | <i>Olink</i> |
|---------------|------------------|-------------------------------|---------------------------|-------------------|------------------|--------------|
| CC-1          | CC               | Y                             | Y                         | N                 | N                | N            |
| CC-2          | CC               | Y                             | Y                         | N                 | N                | N            |
| CC-3          | CC               | Y                             | Y                         | 3                 | N                | Y            |
| CC-4          | CC               | Y                             | Y                         | 3                 | Y                | N            |
| CC-5          | CC               | Y                             | Y                         | 4                 | Y                | N            |
| CC-6          | CC               | Y                             | Y                         | 4                 | Y                | Y            |
| CC-7          | CC               | Y                             | Y                         | 3                 | Y                | Y            |
| CC-8          | CC               | Y                             | Y                         | 4                 | Y                | Y            |
| CC-9          | CC               | Y                             | Y                         | 4                 | Y                | N            |
| CC-10         | CC               | Y                             | Y                         | 4                 | Y                | Y            |
| CC-11         | CC               | Y                             | Y                         | 4                 | Y                | Y            |
| CC-12         | CC               | Y                             | Y                         | 4                 | Y                | N            |
| CC-13         | CC               | Y                             | Y                         | 4                 | Y                | Y            |
| CC-14         | CC               | Y                             | Y                         | 4                 | Y                | Y            |
| CC-15         | CC               | Y                             | Y                         | 3                 | N                | N            |
| CC-16         | CC               | Y                             | Y                         | N                 | Y                | Y            |
| CC-17         | CC               | Y                             | Y                         | N                 | Y                | N            |
| CC-18         | CC               | Y                             | Y                         | N                 | Y                | Y            |
| CC-19         | CC               | Y                             | Y                         | N                 | Y                | Y            |
| CC-20         | CC               | Y                             | Y                         | 3                 | N                | N            |
| CC-21         | CC               | Y                             | Y                         | N                 | Y                | N            |
| CC-22         | CC               | Y                             | Y                         | 3                 | N                | N            |
| CC-23         | CC               | Y                             | Y                         | 3                 | N                | N            |
| CC-24         | CC               | Y                             | Y                         | N                 | Y                | Y            |
| CC-25         | CC               | Y                             | Y                         | N                 | Y                | Y            |
| CC-26         | CC               | Y                             | Y                         | N                 | Y                | N            |
| CC-27         | CC               | Y                             | Y                         | N                 | Y                | N            |
| CC-28         | CC               | Y                             | Y                         | 3                 | N                | N            |
| CC-29         | CC               | Y                             | Y                         | 4                 | N                | Y            |
| CC-30         | CC               | Y                             | Y                         | 4                 | N                | N            |
| CC-31         | CC               | Y                             | Y                         | 3                 | N                | Y            |
| CC-32         | CC               | Y                             | Y                         | N                 | N                | Y            |
| CC-33         | CC               | Y                             | Y                         | 3                 | N                | N            |
| DC-1          | DC               | Y                             | Y                         | 1                 | Y                | N            |
| DC-2          | DC               | Y                             | Y                         | 2                 | Y                | N            |
| DC-3          | DC               | Y                             | Y                         | 1                 | Y                | Y            |
| DC-4          | DC               | Y                             | Y                         | 1                 | Y                | Y            |
| DC-5          | DC               | Y                             | Y                         | 1                 | Y                | Y            |
| DC-6          | DC               | Y                             | Y                         | 1                 | Y                | Y            |
| DC-7          | DC               | Y                             | Y                         | 1                 | Y                | Y            |
| DC-8          | DC               | Y                             | Y                         | 1                 | Y                | Y            |
| DC-9          | DC               | Y                             | Y                         | 2                 | Y                | Y            |
| DC-10         | DC               | Y                             | Y                         | 2                 | Y                | Y            |
| DC-11         | DC               | Y                             | Y                         | 2                 | Y                | Y            |
| DC-12         | DC               | Y                             | Y                         | 2                 | Y                | Y            |
| DC-13         | DC               | Y                             | Y                         | 2                 | Y                | Y            |
| mTBI-1        | mTBI             | Y                             | Y                         | 5                 | Y                | Y            |
| mTBI-2        | mTBI             | Y                             | Y                         | 5                 | Y                | Y            |
| mTBI-3        | mTBI             | Y                             | Y                         | 5                 | Y                | Y            |
| mTBI-4        | mTBI             | Y                             | Y                         | 5                 | Y                | Y            |
| mTBI-5        | mTBI             | Y                             | Y                         | 5                 | Y                | Y            |
| mTBI-6        | mTBI             | Y                             | Y                         | 6                 | Y                | Y            |
| mTBI-7        | mTBI             | Y                             | Y                         | 6                 | Y                | Y            |
| mTBI-8        | mTBI             | Y                             | Y                         | 5                 | Y                | Y            |
| mTBI-9        | mTBI             | Y                             | Y                         | 6                 | Y                | Y            |
| mTBI-10       | mTBI             | Y                             | Y                         | 5                 | Y                | Y            |
| mTBI-11       | mTBI             | Y                             | Y                         | 5                 | Y                | Y            |
| mTBI-12       | mTBI             | Y                             | Y                         | 5                 | Y                | Y            |
| mTBI-13       | mTBI             | Y                             | Y                         | 5                 | Y                | Y            |
| mTBI-14       | mTBI             | Y                             | Y                         | 5                 | Y                | Y            |

(continued)

SUPPLEMENTARY TABLE S3. (CONTINUED)

| <i>Sample</i> | <i>Phenotype</i> | <i>Plasma miRNA (sRNAseq)</i> | <i>EV miRNA (sRNAseq)</i> | <i>iTRAQ pool</i> | <i>CRP ELISA</i> | <i>Olink</i> |
|---------------|------------------|-------------------------------|---------------------------|-------------------|------------------|--------------|
| mTBI-15       | mTBI             | Y                             | Y                         | 5                 | Y                | Y            |
| mTBI-16       | mTBI             | Y                             | Y                         | 5                 | Y                | Y            |
| mTBI-17       | mTBI             | Y                             | Y                         | 6                 | Y                | Y            |
| mTBI-18       | mTBI             | Y                             | Y                         | 6                 | Y                | Y            |
| mTBI-19       | mTBI             | Y                             | Y                         | 6                 | Y                | Y            |
| mTBI-20       | mTBI             | Y                             | Y                         | 6                 | Y                | Y            |
| mTBI-21       | mTBI             | Y                             | Y                         | 6                 | Y                | Y            |
| mTBI-22       | mTBI             | Y                             | Y                         | 6                 | N                | Y            |
| mTBI-23       | mTBI             | Y                             | Y                         | 6                 | Y                | Y            |
| mTBI-24       | mTBI             | Y                             | Y                         | 6                 | Y                | Y            |
| mTBI-25       | mTBI             | Y                             | Y                         | 6                 | N                | Y            |
| mTBI-26       | mTBI             | Y                             | Y                         | 6                 | N                | Y            |
| mTBI-27       | mTBI             | Y                             | Y                         | 6                 | N                | Y            |

List of all samples from discovery cohort used for sRNAseq, iTRAQ, ELISA, and Olink.

miRNA, microRNA; sRNAseq, small RNA sequencing; EV, extracellular vesicle; iTRAQ, isobaric tag for relative and absolute quantitation; ELISA, enzyme-linked immunosorbent assay; CRP, C-reactive protein; CC, community controls; DC, deployed controls; mTBI: chronic mild traumatic brain injury, Y, included; N, not included
