# Supplementary material
Source: PubMed Central journal article supplement (PMC7249467)
Supplement: Supp_Table5.pdf [file Supp_Table5.pdf]

SUPPLEMENTARY TABLE S5. NOVEL miRNAs ASSOCIATED WITH TBI

| <i>Novel miRNA</i> | <i>Sequence</i>       | <i>EV mTBI vs. CC<br/>Log2 fold change</i> | <i>p value</i> | <i>EV mTBI vs. DC<br/>Log2 fold change</i> | <i>p value</i> |
|--------------------|-----------------------|--------------------------------------------|----------------|--------------------------------------------|----------------|
| Novel:chr1_407-5p  | GAUGAUAGGCUGGGUGUG    | -1.28                                      | 0.00434        | -1.34                                      | 0.00960        |
| Novel:chr10_425-3p | AAACAGUCAGGAUGUUGCCU  | -1.01                                      | 0.02101        | -0.67                                      | 0.36737        |
| Novel:chr18_550-5p | UGACAGCAGGACGGAGGU    | 1.21                                       | 0.00353        | 1.61                                       | 0.00044        |
| Novel:chr3_5-3p    | UGGGACUGAGACACUGCC    | -0.54                                      | 0.14533        | -1.42                                      | 0.02593        |
| Novel:chr5_575-3p  | CGCGGGUGCUUCCAGCUCUUU | -2.97                                      | 0.00043        | -0.59                                      | 0.37790        |
| Novel:chr7_33-5p   | AGUUGGUCCGAGUGUUGUG   | -1.89                                      | 0.00186        | -1.66                                      | 0.01809        |

CC, community controls; DC, deployed controls; EV, extracellular vesicle; miRNA, microRNA; mTBI, chronic mild traumatic brain injury.
